# Supplementary material for: Versatile electrochemical activation strategy for high-performance supercapacitor in a model of MnO2
Source: Royal Society of Chemistry journal article supplement (doi:10.1039/c9ta08278f), 2019-01-01
Supplement: c9ta08278f1.pdf [file c9ta08278f1.pdf]

## *Supporting Information*

### **Versatile Electrochemical Activation Strategy for High-Performance Supercapacitor in the Model of MnO<sub>2</sub>**

Yaxiong Zhang<sup>#</sup>, Yupeng Liu<sup>#</sup>, Zhenheng Sun, Jiecai Fu\*, Situo Cheng, Peng Cui, Jinyuan Zhou, Zhenxing Zhang, Xiaojun Pan, Weihua Han, Erqing Xie\*

Key Laboratory for Magnetism and Magnetic Materials of the Ministry of Education, School of Physical Science and Technology, Lanzhou University, Lanzhou 730000, China

\*Corresponding authors

Key Laboratory of Magnetism and Magnetic Materials of the Ministry of Education, Lanzhou University, Lanzhou 730000, P. R. China

E-mail: [fujc@lzu.edu.cn](mailto:fujc@lzu.edu.cn) (J. Fu); [xieeq@lzu.edu.cn](mailto:xieeq@lzu.edu.cn) (E. Xie)

<sup>#</sup>These authors contributed equally to this work.

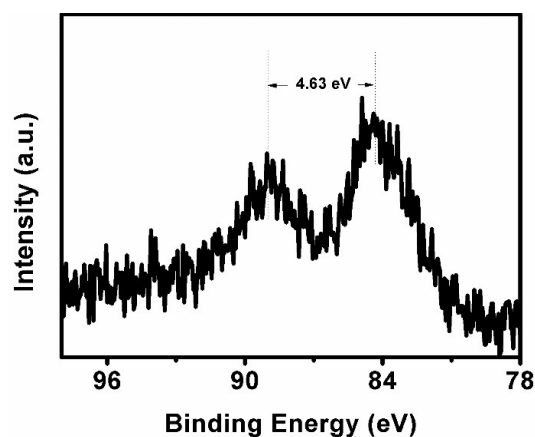

**Figure S1.** High resolution XPS spectra of Mn 3s for the freshly sputtered MnO<sub>2</sub>@CNT. The peak splitting( $\Delta E$ ) of Mn 3s is linearly correlated with the average oxidation state(AOS) of Mn ( $AOS = 8.956 - 1.126 \times \Delta E$ ), and the AOS of freshly sputtered MnO<sub>2</sub> is about 3.7.<sup>1,2</sup>

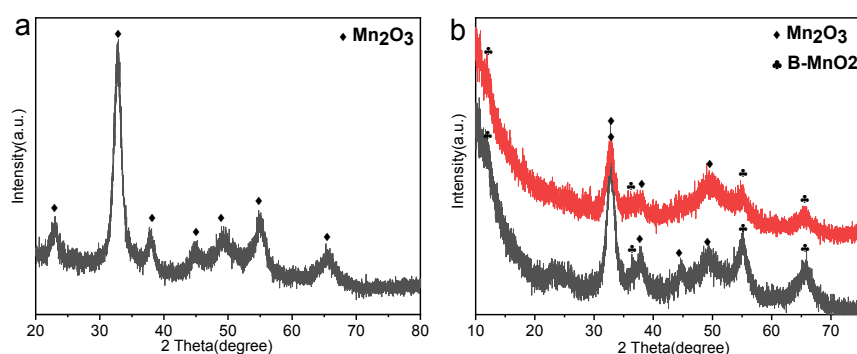

**Figure S2.** XRD patterns of (a) the freshly sputtered MnO<sub>2</sub>@CNT; (b) MnO<sub>2</sub>-NS@CNT 2C-10D after 500- (black line) and 5000-cycle (red line) electrochemical activation operations; The XRD patterns of the freshly sputtered MnO<sub>2</sub>@CNT are readily indexed to the Mn<sub>2</sub>O<sub>3</sub> (JCPDS No. 10-0069). After the electrochemical activation process, the part of XRD peaks corresponding to Mn<sub>2</sub>O<sub>3</sub> disappeared, and the peaks assigned to Birnessite-MnO<sub>2</sub> (JCPDS No. 18-0802) appeared.

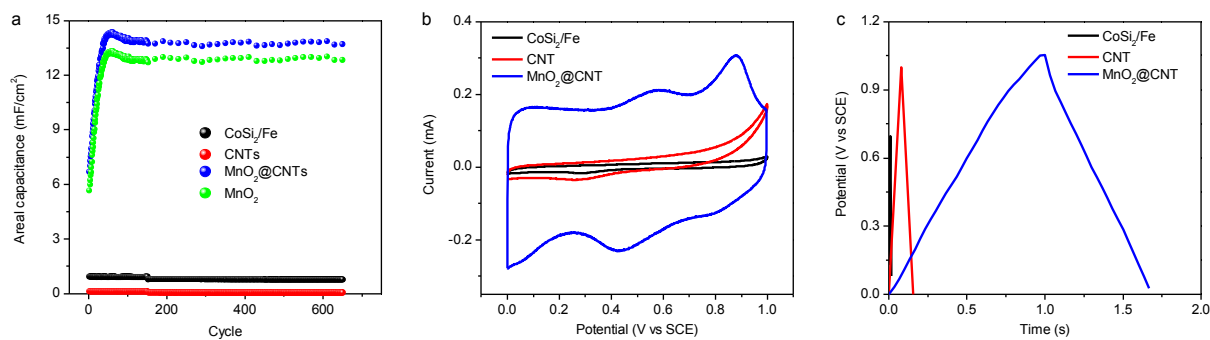

**Figure S3.** Electrochemical cycling performance of CoSi<sub>2</sub>/Fe, CNTs, MnO<sub>2</sub>@CNTs and MnO<sub>2</sub> at the current of 2 mA/cm<sup>2</sup>.

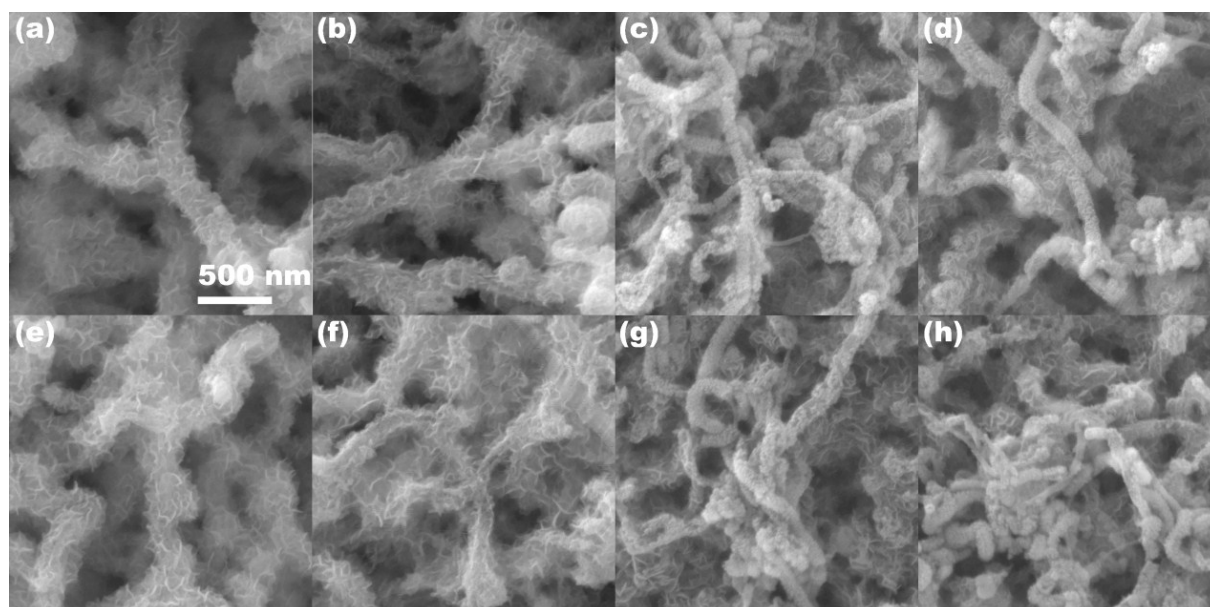

**Figure S4.** (a-d) SEM images of MnO<sub>2</sub>-NS@CNTs 2C-1D, 2C-5D, 2C-10D and 2C-20D after 150 circles electrochemical activation. (e-h) SEM images of MnO<sub>2</sub>-NS@CNTs 2C-1D, 2C-5D, 2C-10D and 2C-20D with 500 cycles electrochemical test at the current density of 10 mA/cm<sup>2</sup> after electrochemical activation. There is no obvious change in SEM images before and after 500 circles.

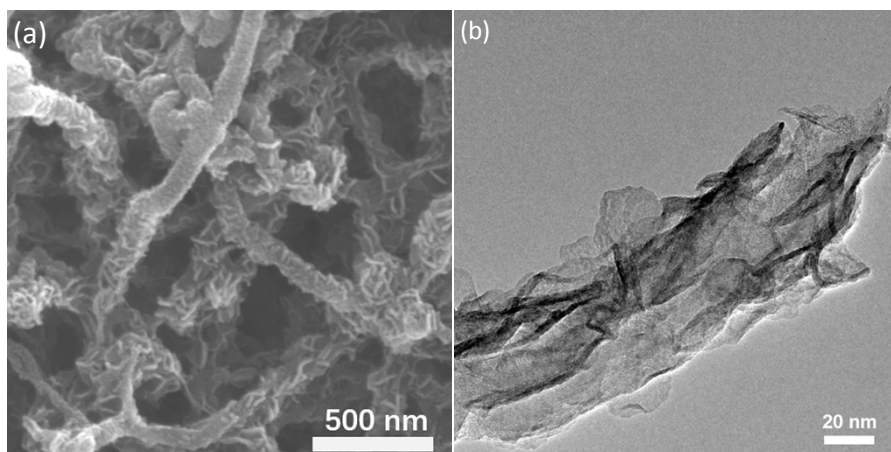

**Figure S5.** (a) SEM image and (b) TEM image of  $\text{MnO}_2\text{-NS@CNT}$  2C-10D with first electrochemical activation and later 5000-cycle GCD process, respectively.

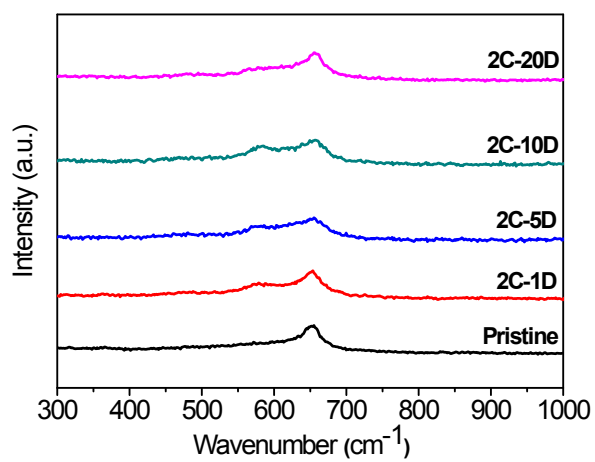

**Figure S6.** Raman of pristine,  $\text{MnO}_2\text{-NS@CNT}$  2C-1D, 2C-5D, 2C-10D and 2C-20D.

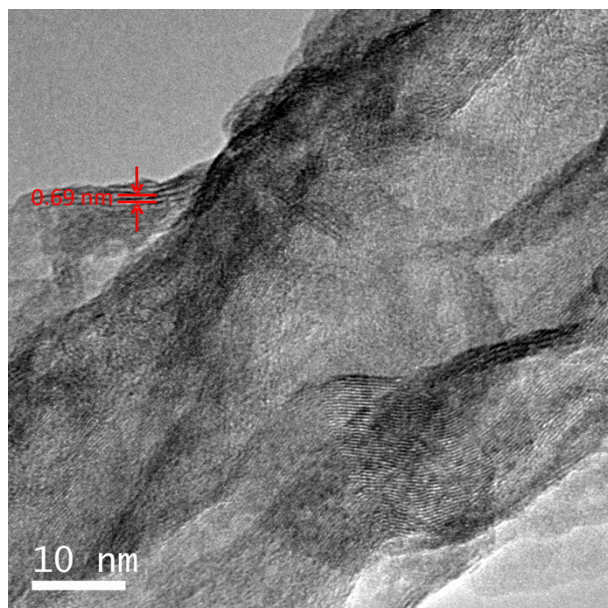

**Figure S7.** TEM image of MnO<sub>2</sub>-NS@CNT 2C-10D.

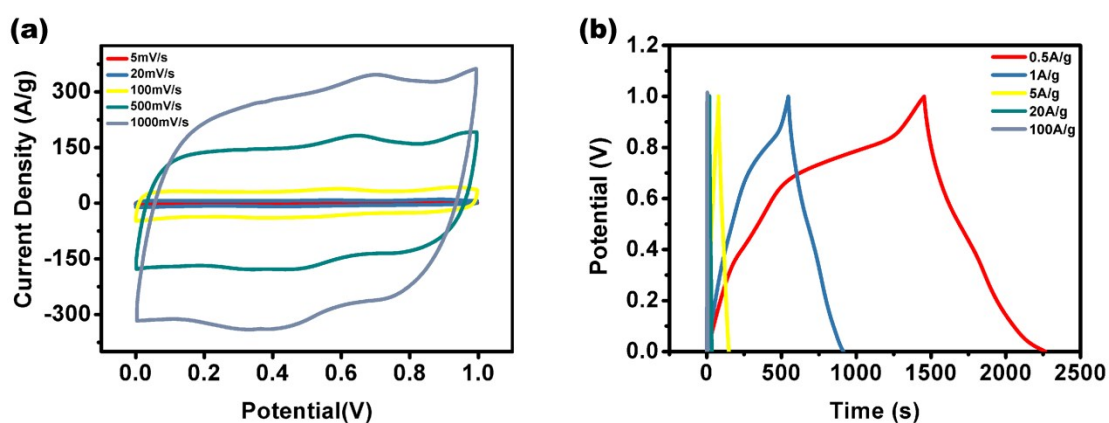

**Figure S8.** Electrochemical performance of MnO<sub>2</sub>-NS@CNT 2C-10D sample. (a) CV curves at different scan rates of 5 mV/s, 20 mV/s, 100 mV/s, 500 mV/s, and 10000 mV/s. (b) GCD curves at different current density of 0.5 A/g, 1 A/g, 5 A/g, 20 A/g, and 100 A/g.

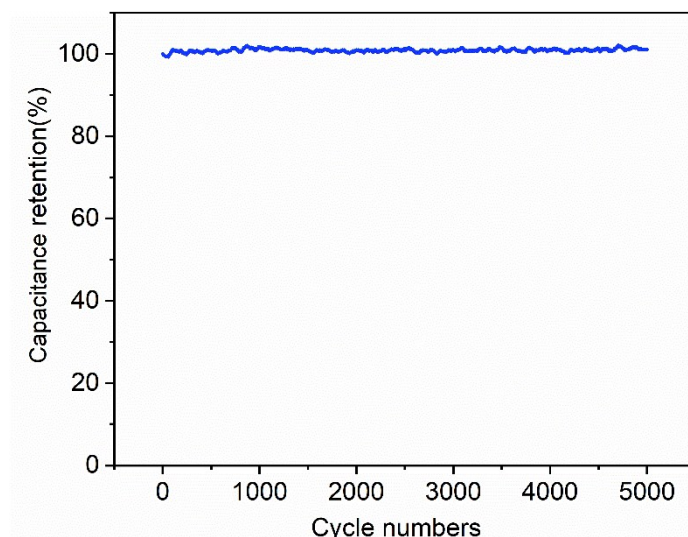

**Figure S9.** Electrochemical cycling performance of the electrochemically activated MnO<sub>2</sub>-NS @CNTs 2C-10D at the current of 10 mA/cm<sup>2</sup>.

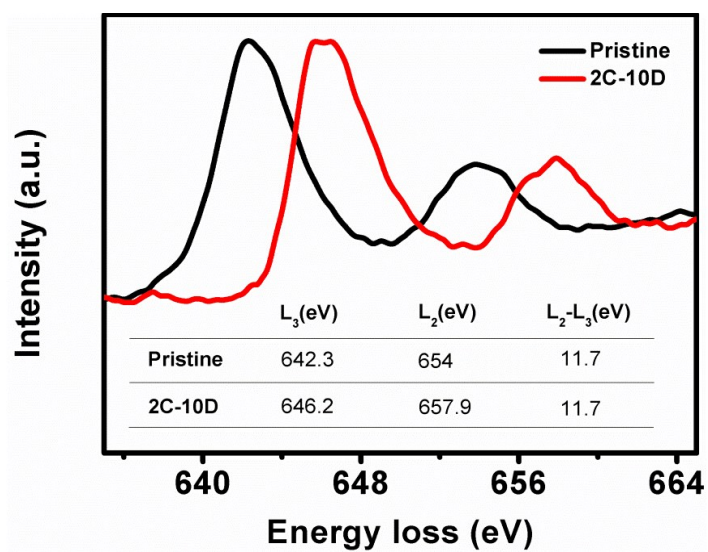

**Figure S10.** EELS spectra of fresh prepared MnO<sub>2</sub>@CNTs and electrochemical activated MnO<sub>2</sub>-NS@CNT 2C-10D.

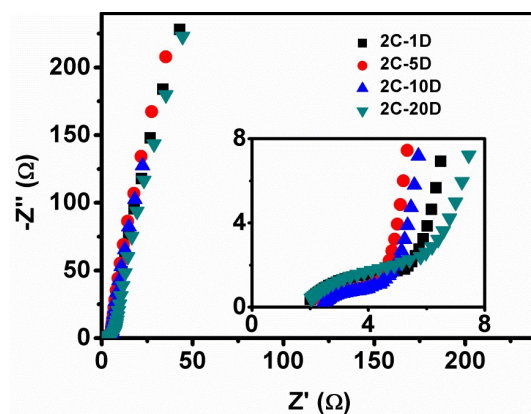

**Figure S11.** Nyquist plots of MnO<sub>2</sub>-NS@CNT 2C-1D, 2C-5D, 2C-10D, and 2C-20D.

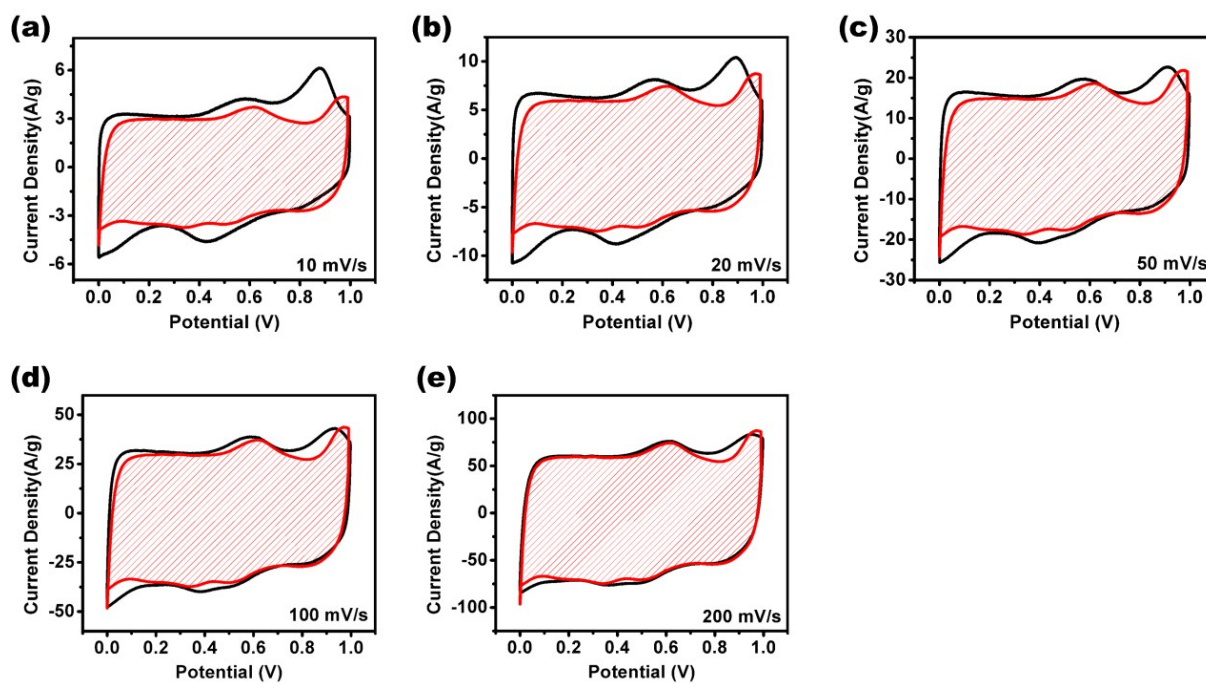

**Figure S12.** CV curves of the MnO<sub>2</sub>-NS@CNT 2C-10D electrode at different scan rate, and the shadowed area represents the surface capacitive contribution.

**Table S1.** Electrochemical rate performance of Mn-based supercapacitor electrode.

| Active materials                                    | Current density change                         | Current density change multiple | Capacitance retention | Ref.   |
|-----------------------------------------------------|------------------------------------------------|---------------------------------|-----------------------|--------|
| <b>Co<sub>3</sub>O<sub>4</sub>@MnO<sub>2</sub></b>  | 4 A/g to 20 A/g                                | 5 times                         | 79%                   | 3      |
| <b>CNT@NCT@MnO<sub>2</sub></b>                      | 0.5 A/g to 10 A/g                              | 20 times                        | 45%                   | 4      |
| <b>K<sub>x</sub>MnO<sub>2</sub></b>                 | 1 A/g to 36 A/g                                | 36 times                        | 44%                   | 5      |
| <b>Hydrophilic Carbon Cloth@MnO<sub>2</sub></b>     | 1 A/g to 10 A/g                                | 10 times                        | 57%                   | 6      |
| <b>MnO<sub>2</sub></b>                              | 1 A/g to 20 A/g                                | 20 times                        | 60%                   | 7      |
| <b>Graphene/MnO<sub>2</sub>@Conductive Wrapping</b> | 0.1 mA/cm <sup>2</sup> to 5 mA/cm <sup>2</sup> | 50 times                        | 44%                   | 8      |
| <b>MnO<sub>2</sub> film</b>                         | 5 mA/cm <sup>2</sup> to 25 mA/cm <sup>2</sup>  | 5 times                         | 15%                   | 9      |
| <b>N-CNTs@MnO<sub>2</sub></b>                       | 1 A/g to 10 A/g                                | 10 times                        | 50%                   | 10     |
| <b>Na<sub>0.5</sub>MnO<sub>2</sub></b>              | 1 A/g to 16 A/g                                | 10 times                        | 68%                   | 11     |
| <b>MnO<sub>2</sub></b>                              | 1 A/g to 50 A/g                                | 50 times                        | 28%                   | 12     |
| <b>MnO<sub>2</sub>@CNT</b>                          | 0.5 A/g to 100 A/g                             | 200 times                       | 80%                   | 2C-1D  |
| <b>MnO<sub>2</sub>@CNT</b>                          | 0.5 A/g to 100 A/g                             | 200 times                       | 80%                   | 2C-5D  |
| <b>MnO<sub>2</sub>@CNT</b>                          | 0.5 A/g to 100 A/g                             | 200 times                       | 79%                   | 2C-10D |
| <b>MnO<sub>2</sub>@CNT</b>                          | 0.5 A/g to 100 A/g                             | 200 times                       | 79%                   | 2C-20D |

### Reference

1. X. Tan, R. Liu, C. Xie and Q. Shen, *J. Power Sources*, 2018, **374**, 134-141.
2. A. S. Poyraz, J. Huang, C. J. Pelliccione, X. Tong, S. Cheng, L. Wu, Y. Zhu, A. C. Marschilok, K. J. Takeuchi and E. S. Takeuchi, *J. Mater. Chem. A*, 2017, **5**, 16914-16928.
3. G. Liu, C. Kang, J. Fang, L. Fu, H. Zhou and Q. Liu, *J. Power Sources*, 2019, **431**, 48-54.



4. Y. Wang, D. Zhang, Y. Lu, W. Wang, T. Peng, Y. Zhang, Y. Guo, Y. Wang, K. Huo, J.-K. Kim and Y. Luo, *Carbon*, 2019, **143**, 335-342.
5. N. Jabeen, Q. Xia, S. V. Savilov, S. M. Aldoshin, Y. Yu and H. Xia, *ACS Appl. Mater. Interfaces*, 2016, **8**, 33732-33740.
6. Z. Chen, L. Zheng, T. Zhu, Z. Ma, Y. Yang, C. Wei, L. Liu and X. Gong, *Adv. Electron. Mater.*, 2019, **5**, 1800721.
7. C. Liu, Y. Chen, Z. Dong, X. Wu, Y. Situ and H. Huang, *Electrochim. Acta*, 2019, **298**, 678-684.
8. G. Yu, L. Hu, N. Liu, H. Wang, M. Vosgueritchian, Y. Yang, Y. Cui and Z. Bao, *Nano Lett.*, 2011, **11**, 4438-4442.
9. Y. Hou, Y. Cheng, T. Hobson and J. Liu, *Nano Lett.*, 2010, **10**, 2727-2733.
10. X. Ou, Q. Li, D. Xu, J. Guo and F. Yan, *Chem. Asian J.*, 2018, **13**, 545-551.
11. N. Jabeen, A. Hussain, Q. Xia, S. Sun, J. Zhu and H. Xia, *Adv. Mater.*, 2017, **29**, 1700804.
12. T. Xiong, W. S. V. Lee and J. Xue, *ACS Appl. Energy Mater.*, 2018, **1**, 5619-5626.
